# Supplementary material
Source: HighWire-hosted journal article supplement (https://bmjopen.bmj.com/content/8/7/e020927)
Supplement: inline-supplementary-material-2 [file inline-supplementary-material-2.pdf]

**Table 1****Individual Study Results**

| <b>First Author/Year</b> | <b>Diagnosis</b>   | <b>Outcome Measure</b>                                                                                                                                                                                                                                                                    | <b>Result/Findings</b>                                                                                                                                                                                                                                                                                     |
|--------------------------|--------------------|-------------------------------------------------------------------------------------------------------------------------------------------------------------------------------------------------------------------------------------------------------------------------------------------|------------------------------------------------------------------------------------------------------------------------------------------------------------------------------------------------------------------------------------------------------------------------------------------------------------|
| Ågren (2010)             | HF<br>(NYHA II-IV) | Caregiver Burden Scale<br>Short Form (SF)-36<br>Beck Depression Inventory<br>Control Attitude Scale<br>Knowledge Questionnaire<br>Charlson Co-morbidity Index                                                                                                                             | 68% of partners = low level burden<br>30% of partners = medium burden<br>2% of partners = high burden<br>Regression analysis showed poor mental health ( $p=0.001$ ) and lower perceived control ( $p=0.001$ ) in partners and poor patient physical health ( $p=0.001$ ) predicts higher caregiver burden |
| Al-Rawashdeh (2017)      | HF<br>(NYHA I-IV)  | Beck Depression Inventory<br>Minnesota Living with HF<br>(modified for caregivers)<br>Patient Health Questionnaire<br>Short-Form 12 Health Survey                                                                                                                                         | Patients whose spouse has higher sleep disturbance have poorer mental well-being ( $\beta = -2.19, p < 0.05$ )<br>Caregiver sleep disturbance significantly correlated with their own physical ( $\beta = -4.94, p < 0.001$ ) and mental well-being scores ( $\beta = -6.62, p < 0.001$ )                  |
| Andersen (2015)          | HF                 | n/a                                                                                                                                                                                                                                                                                       | 1) Involvement, willingness to assume responsibility and desire for knowledge<br>2) Unclear Responsibility and Insufficient Flow of Information<br>3) Available and Competent Supporters                                                                                                                   |
| Badr (2017)              | COPD               | Patient Health Questionnaire<br>COPD Severity Index<br>Activities of Daily Living scale<br>Lubben Social Network Scale<br>Zarit Burden Interview<br>Checklist created for this study<br>re: co-morbidities (patients & caregivers)<br>Smoking status<br>Self-management behaviours – pts. | 30% of patients and 20% of caregivers = mild depression<br>30% of patients and 8% of caregivers = moderate to severe depression.<br>Depression levels of patients and caregivers were significantly correlated ( $r=0.28, P= 0.01$ )                                                                       |

| First Author/Year | Diagnosis            | Outcome Measure                                                                                                                                     | Result/Findings                                                                                                                                                                                                                                                                                                                                             |
|-------------------|----------------------|-----------------------------------------------------------------------------------------------------------------------------------------------------|-------------------------------------------------------------------------------------------------------------------------------------------------------------------------------------------------------------------------------------------------------------------------------------------------------------------------------------------------------------|
| Bakas (2006)      | HF<br>(NYHA II-IV)   | Control Attitudes Scale<br>Oberst Caregiving Burden Scale<br>Bakas Caregiving Outcomes Scale<br>Medical Outcomes Study<br>General Health            | Caregivers reported their lives had changed for the worse due to providing care (M= 3.7, SD =1.5, 1 worst, 7 best)<br>Performing household tasks and managing patient behaviours were most difficult, and the caregiver's emotional and financial well-being, time for social activities, and general health had deteriorated. ( $p = -0.46$ , $p < 0.05$ ) |
| Baker (2010)      | HF<br>(LVAD in situ) | n/a                                                                                                                                                 | 1) Commitment                                                                                                                                                                                                                                                                                                                                               |
| Bove (2016)       | COPD<br>(GOLD C&D)   | n/a                                                                                                                                                 | 1) Undefined and unpredictable responsibility                                                                                                                                                                                                                                                                                                               |
| Burke (2014)      | HF<br>(NYHA II-IV)   | n/a                                                                                                                                                 | 1) Health Manager/Care Plan Enforcer<br>2) Advocate for Improved Quality of Life<br>3) Expert in the Lived Experience of HF<br>4) Expressions of Role Conflict and Role Strain                                                                                                                                                                              |
| Chung (2016)      | HF<br>(NYHA II-IV)   | Beck Depression Inventory-II<br>Zarit Burden Interview<br>Oberst Caregiving Burden Scale<br>Bakas Caregiving Outcome Scale<br>Medical Outcome Study | 42% reported severe burden<br>Caregivers of patients with depressive symptoms had a higher level of burden (25±13 vs 13.5±12 on the ZBI; $p < 0.001$ ),<br>Caregivers reported worse mental quality of life (46±10 vs 51±10 on the -12v2; $p = 0.026$ ) than those of patients without depressive symptoms                                                  |
| Clark (2008)      | HF<br>(NYHA II – IV) | n/a                                                                                                                                                 | 1) The sharing of caring<br>2) The basis of care: formal and informal forms of knowledge about CHF<br>3) The activities of informal care: visible and invisible                                                                                                                                                                                             |
| Cossette (1993)   | COPD<br>(GOLD III-V) | The SCL-90 scale<br>The subjective Stress Scale<br>Caregiving tasks index<br>The family/friend support index                                        | Nearly 40% of wives used psychotropic drugs<br>Difficult emotional support significantly predicted somatization ( $\beta = 0.26$ , $p \leq 0.05$ ), depression ( $\beta = 0.34$ , $p \leq 0.01$ ), obsession compulsion ( $\beta = 0.43$ , $p \leq 0.01$ ), anxiety ( $\beta = 0.26$ , $p \leq 0.05$ ), and hostility ( $\beta = 0.37$ , $p \leq 0.01$ )    |

| First Author/Year  | Diagnosis              | Outcome Measure                                                                                                                                                                                                                                                              | Result/Findings                                                                                                                                                                                                                                                                                                                                                      |
|--------------------|------------------------|------------------------------------------------------------------------------------------------------------------------------------------------------------------------------------------------------------------------------------------------------------------------------|----------------------------------------------------------------------------------------------------------------------------------------------------------------------------------------------------------------------------------------------------------------------------------------------------------------------------------------------------------------------|
| Evangelista (2002) | HF<br>(NYHA I – IV)    | SF-12<br>(Mental Component Summary Scale)                                                                                                                                                                                                                                    | Caregiver emotional wellbeing associated with patient's emotional wellbeing<br>Caregivers' mental health score: Adjusted R2 = 0 .536, F = 40.299, p = .000<br>Caregivers reported higher mental wellbeing than patients (P < .001, p = 0.018 (patients), p = 0.118).                                                                                                 |
| Figueiredo (2013)  | COPD<br>(GOLD I-IV)    | Carers Assessment of Managing Index<br>(Portuguese version)<br>International Classification of<br>Functioning Disability and Health                                                                                                                                          | Better physical health perception was associated with an increasing use of<br>problem-solving strategies ( $r_s = -0.313$ ; p = 0.029)                                                                                                                                                                                                                               |
| Figueiredo (2014)  | COPD<br>(GOLD I-IV)    | International Classification of<br>Functioning Disability and Health<br>Hospital Anxiety and Depression Scale<br>(Portuguese version)<br>Carers' Assessment of Difficulties Index<br>(Portuguese version)                                                                    | 61.9% = caregivers of early COPD patients observed to be anxious<br>70.4% = caregivers of advanced COPD patients observed to be anxious<br>Depression significantly more frequent in caregivers of advanced COPD<br>patients (p = 0.030)<br>Self-rated physical (p = 0.035) and mental health (p = 0.011) worse in<br>caregivers of advanced COPD patients           |
| Figueiredo (2015)  | COPD<br>(Mod – Severe) | n/a                                                                                                                                                                                                                                                                          | 1) Meaning<br>2) Challenges and constraints<br>3) Fears and concerns about the future<br>4) Needs<br>5) Positive aspects                                                                                                                                                                                                                                             |
| Grigorovich (2017) | HF<br>(NYHA II-IV)     | Center for Epidemiological<br>Studies-Depression (CES-D)<br>Positive Affect Scale<br>Caregiver Impact Scale<br>Caregiver Assistance Scale<br>Pearlin Mastery Scale<br>Medical Outcomes Study Social, Support Survey, Personal Gain Scale, Brain Impairment Behaviour, MLWHFQ | Caregivers depression remained stable over 1 year (mean $-0.17 \pm SE 0.11$ , p > 0.1)<br>Caregivers depression associated with participation restriction (p < 0.05)<br>Caregivers positive affect remained stable over 1 year ( $0.10 \pm 0.10$ , p > 0.1)<br>Positive affect associated (p < 0.05) with caregivers feelings of personal gain and<br>social support |

| First Author/Year   | Diagnosis | Outcome Measure                                                                                                                                                                                                                                                                              | Result/Findings                                                                                                                                                                                                                                                                                                                                                                                                                                                                      |
|---------------------|-----------|----------------------------------------------------------------------------------------------------------------------------------------------------------------------------------------------------------------------------------------------------------------------------------------------|--------------------------------------------------------------------------------------------------------------------------------------------------------------------------------------------------------------------------------------------------------------------------------------------------------------------------------------------------------------------------------------------------------------------------------------------------------------------------------------|
| *Halm et al. (2006) | CAD       | Caregiving Burden Scale<br>Bakas Caregiving Outcomes Scale<br>SF-12 (spouse proxy ratings)<br>Karnofsky Performance Scale<br>Caregiver Competence Scale<br>State-Trait Anxiety Inventory<br>Center for Epidemiologic Studies Depression Scale<br>Mutuality Scale<br>Expressive Support Scale | Higher burden scores were associated with patient's gender (female) ( $\beta = .21$ , $p = .02$ ), increased personal gain ( $\beta = .29$ , $p = .004$ ), increased caregiver competence ( $\beta = .20$ , $p = .05$ ).<br>Lower burden was associated with better health status of the patient ( $\beta = -.22$ , $p = .02$ ), higher caregiver mental HRQL ( $\beta = -.38$ , $p = .01$ ).<br>caregiver burden was not significantly different at 3, 6, or 12 months post-surgery |
| *Halm et al. (2007) | CAD       | (as above Halm, 2006)                                                                                                                                                                                                                                                                        | Controlling for caregiver and patient characteristics, caregivers who perceived less mastery ( $\beta = 0.45$ , $p = .001$ ) had higher depressive symptoms                                                                                                                                                                                                                                                                                                                          |
| *Halm (2016)        | CAD       | n/a                                                                                                                                                                                                                                                                                          | 1) Knowing what I am supposed to be doing<br>2) Managing multiple medications<br>3) Assisting with mobility<br>4) Dealing with unmonitorable symptoms<br>5) Managing poor appetite<br>6) Keeping spirits up<br>7) Navigating memory loss & confusion<br>8) Surviving moodiness<br>9) Dealing with financial matters                                                                                                                                                                  |
| *Halm (2017)        | CAD       | n/a                                                                                                                                                                                                                                                                                          | 1) Caregiving work – comfort, monitoring, support & functional                                                                                                                                                                                                                                                                                                                                                                                                                       |
| Hess (2009)         | HF        | Short-Form Test of Functional Health Literacy<br>Self- Care Index of Heart Failure<br>Family Caregiver Medication Administration Hassles (FCMAHS)                                                                                                                                            | Analyses are the individual results for caregiver health literacy and medication medication administration hassles as the study was insufficiently powered<br>80% of caregivers had adequate health literacy<br>Average FCMAHS score was 27.80 (S.D. = 14.74), with a range of 10-44. Higher scores (out of 100) indicate greater medication administration hassle.                                                                                                                  |

| First Author/Year  | Diagnosis                | Outcome Measure                                                                                                                                                                                                                     | Result/Findings                                                                                                                                                                                                                                                                                                                                                                                                       |
|--------------------|--------------------------|-------------------------------------------------------------------------------------------------------------------------------------------------------------------------------------------------------------------------------------|-----------------------------------------------------------------------------------------------------------------------------------------------------------------------------------------------------------------------------------------------------------------------------------------------------------------------------------------------------------------------------------------------------------------------|
| Hooley (2005)      | HF                       | Minnesota Living with Heat Failure Questionnaire<br>Beck Depression Inventory II<br>Zarit Caregiver Burden Interview                                                                                                                | 18% of caregivers had high likelihood of clinical depression<br>Significant correlation between: caregiver burden and caregiver depression scores ( $r=0.61$ ; $p<0.0001$ ), and caregiver burden and patient depression scores ( $r=0.28$ ; $p<0.05$ )                                                                                                                                                               |
| Hwang (2011)       | HF<br>(NYHA I – IV)      | Dutch Objective Burden Inventory (English version)<br>Medical Outcome Study Social Support Survey<br>Control Attitudes Scale-Revised<br>Caregiver Reaction Assessment<br>Short Form 36 Health Survey<br>Charlson Co-morbidity Index | Lack of family support for caregivers correlated with the patient's NYHA class, caregivers' relationship to the patient, $p=0.003$ , caregivers' perceived control $p<.001$ and social support ( $p<.001$ )<br>impact of caregiving on caregivers' health was associated with time since the patient's last hospital discharge, ( $p=.008$ caregivers' perceived control, ( $p=.03$ ) and social support ( $p<.001$ ) |
| Hynes (2012)       | COPD<br>(NYHA III or IV) | n/a                                                                                                                                                                                                                                 | 1) Then and Now<br>2) Awareness of the disease and constant state of anxiety<br>3) The Caring Role<br>4) Perceived illness effects: striving for normalisation and symptom burden<br>5) Support<br>6) Contact with healthcare services                                                                                                                                                                                |
| Imes (2011)        | HF<br>(NYHA III-IV)      | n/a                                                                                                                                                                                                                                 | 1) My experience of HF in My Loved One<br>2) Experience with Healthcare providers<br>3) Patient's experience of HF as Perceived by the Partner                                                                                                                                                                                                                                                                        |
| Karmilovich (1994) | HF<br>(NYHA III OR IV)   | Caregiver Demands Scale (physical demands/role alteration)<br>Brief Symptom Inventory                                                                                                                                               | Significant positive correlation between the number of helping behaviours and the level of stress ( $r = 0.32$ , $p=0.04$ )<br>Positive correlation between perceived difficulty performing caring activity and level of stress ( $r = 0.43$ , $p=0.01$ )<br>Burden score Mean = 15.27 (SD 11.3)                                                                                                                      |

| First Author/Year | Diagnosis                | Outcome Measure                                                                                                                                                                                                                                                                                                  | Result/Findings                                                                                                                                                                                                                                                                                                                          |
|-------------------|--------------------------|------------------------------------------------------------------------------------------------------------------------------------------------------------------------------------------------------------------------------------------------------------------------------------------------------------------|------------------------------------------------------------------------------------------------------------------------------------------------------------------------------------------------------------------------------------------------------------------------------------------------------------------------------------------|
| Kitko (2010)      | HF                       | n/a                                                                                                                                                                                                                                                                                                              | <ol style="list-style-type: none"> <li>1) The work of providing care</li> <li>2) Work of living with the illness</li> <li>3) The Work of navigating the system</li> <li>4) The work of maintaining self</li> <li>5) The work of managing the household</li> <li>6) The work of vigilance</li> <li>7) The work of normalcy</li> </ol>     |
| Kneeshaw (1999)   | CAD                      | Mutuality Scale<br>Preparedness for Caregiving Scale<br>Recovery Inventory<br>OARS activities of daily living                                                                                                                                                                                                    | Significant decrease between the mutuality scale means at hospital discharge and at 3 months ( $p < .05$ )<br>Preparedness for caring - most common concern of the caregivers was fear of the unknown, especially an emergency                                                                                                           |
| Liljeroos (2014)  | HF                       | n/a                                                                                                                                                                                                                                                                                                              | <ol style="list-style-type: none"> <li>1) Dyads perceive a need for continuous guidance throughout difference phases of the illness trajectory</li> <li>2) Dyads perceive a need to share burden and support with each other and other dyads</li> </ol>                                                                                  |
| Lindqvist (2013)  | COPD<br>(Mild to severe) | n/a                                                                                                                                                                                                                                                                                                              | <ol style="list-style-type: none"> <li>(1) Unchanged life situation where no support was needed</li> <li>(2) Socially restricted life and changed roles where support is needed</li> <li>(3) Changes in health where support is needed</li> <li>(4) Changes in the couple's relationship and their need for support.</li> </ol>          |
| Loftus (2004)     | HF<br>(NYHA II-IV)       | Self-reported health status questionnaire<br>State-Trait Anxiety Inventory<br>Pearlin scale of Mastery<br>Rosenberg Self-Esteem Scale<br>Social Support Scale<br>Dyadic Adjustment Scale<br>Caregiver Distress Scale<br>Sense of Competence Questionnaire<br>Centre for Epidemiological Studies depression Scale | Severity of heart failure and level of patient disability predictive of caregiver distress (personal cost, ANCOVA, $F=3.94$ , $p < .05$ ; depression, ANCOVA, $F=7.15$ , $p < .05$ ) independent of caregiver neuroticism<br>Satisfaction with social support was a better predictor of distress than a global measure of social support |

| <b>First Author/Year</b> | <b>Diagnosis</b>                                        | <b>Outcome Measure</b>                                                                                           | <b>Result/Findings</b>                                                                                                                                                                                                                                                                                                                                              |
|--------------------------|---------------------------------------------------------|------------------------------------------------------------------------------------------------------------------|---------------------------------------------------------------------------------------------------------------------------------------------------------------------------------------------------------------------------------------------------------------------------------------------------------------------------------------------------------------------|
| Lum (2014)               | HF<br>(NYHA II-IV)                                      | Zarit Burden Inventory<br>Benefit Finding Scale<br>Patient Health Questionnaire                                  | Higher relationship quality associated with less caregiver burden and more caregiver benefit - (r = -0.54, 95% CI: [-0.81, -0.10], P = 0.02)                                                                                                                                                                                                                        |
| Luttik (2007)            | HF                                                      | n/a                                                                                                              | 1) Changes in life<br>2) Anxiety<br>3) Changes in relationship<br>4) Sexuality<br>5) Coping/Support                                                                                                                                                                                                                                                                 |
| Luttik (2009)            | HF<br>(NYHA II-IV)                                      | Medical Outcome Study<br>General Health Survey (RAND-36)<br>Dutch Objective Burden Inventory<br>Cantril's Ladder | Partners of people with CHF reported lower general health than partners of healthy persons (F (1,598) = 4.066, P < 0.05)<br>Interaction effect between group (partners of people with CHF vs. individuals living with a healthy partner) and gender for general well-being, F(1,581) = 4.526, P < 0.05, and for perceived health change, F(1,604) = 4.283, P < 0.05 |
| Marcuccilli (2011)       | HF –LVAD<br>in situ                                     | n/a                                                                                                              | 1) Caregiving – a “24/7” Responsibility<br>2) Coping Strategies<br>3) Caregiving satisfaction                                                                                                                                                                                                                                                                       |
| Marcuccilli (2014)       | HF-LVAD                                                 | n/a                                                                                                              | 1) Advanced Heart Failure is a Life Changing Event<br>2) Self-doubt about LVAD Caregiving Improved with Time<br>3) Lifestyle Adjustments come with Time<br>4) Persistent Worry and Stress<br>5) Caregiving is not a Burden – it's part of life                                                                                                                      |
| Miravittles (2015)       | COPD<br><br>(National Institute of Statistics in Spain) | Survey on Disabilities,<br>Personal Autonomy, and<br>Dependency Situations                                       | 35% of caregivers had health problems<br>83% of caregivers had social/leisure problems<br>38% of those of working age had profession related problems                                                                                                                                                                                                               |

| First Author/Year  | Diagnosis | Outcome Measure                                                                                                                                                                                                                                           | Result/Findings                                                                                                                                                                                                                                                                                                                                                                                                      |
|--------------------|-----------|-----------------------------------------------------------------------------------------------------------------------------------------------------------------------------------------------------------------------------------------------------------|----------------------------------------------------------------------------------------------------------------------------------------------------------------------------------------------------------------------------------------------------------------------------------------------------------------------------------------------------------------------------------------------------------------------|
| Nakken (2017)      | COPD      | Charlson comorbidity index<br>Dutch relationship questionnaire<br>Care dependency scale<br>Utrecht Coping List<br>Hospital Anxiety and Depression Scale<br>EuroQol-5 Dimensions<br>Medical Outcome Study Social Support<br>Family Appraisal of Caregiving | Depression levels (P=0.261) social support (P=0.222 to 0.897) and caregiver burden (P=0.410 to 0.720) were comparable for male and female caregivers<br>Female caregivers had more symptoms of anxiety (P<0.0001) and worse health status (P=0.001)<br>Lower levels of social support were associated with higher levels of caregiver strain<br>No differences in caregiver burden between gender (P=0.401 to 0.724) |
| Näsström (2017)    | HF        | Charlson comorbidity index<br>Relatives' perception of quality of care<br>Dutch Objective Burden Inventory<br>EuroQol<br>The Patient Health Questionnaire                                                                                                 | 1) Adapting to the caring needs and illness trajectory<br>2) Coping with caregiving demands<br>3) Interacting with healthcare providers<br>4) Need for knowledge to comprehend the health situation<br>More information was associated with better perceived health (rho 0.56, P < 0)                                                                                                                                |
| Park (2013)        | CAD       | Caregiving Burden Scale                                                                                                                                                                                                                                   | Subscale scores of caregiving demand and caregiving difficulty were 31.1 and 22.9<br>Demanding caregiving activities perceived by caregivers were: providing transportation, additional household tasks, providing emotional support, and two tied for fourth: monitoring symptoms and additional tasks outside the home                                                                                             |
| Pattenden (2007)   | HF        | n/a                                                                                                                                                                                                                                                       | 1) Symptoms, multiple medications, co-morbidities<br>2) Confusion, anxiety and depression<br>3) Adapting life to heart failure<br>4) Changing roles for carers                                                                                                                                                                                                                                                       |
| Pi-Ming Yeh (2012) | HF        | JAREL Spiritual Well-being Scale<br>Carers Assessments of Managing Index<br>Care Continuity Scale<br>Caregiver Reaction Assessment<br>Caregivers Esteem Subscale<br>Lack of Family Support Subscale                                                       | People expressed medium levels of ADL dependency (Mean = 9.56, SD = 3.93)<br>Higher scores of the older people's ADL dependence ( $\beta = 0.47$ , P < 0.001), lower scores of quality of relationship ( $\beta = -0.39$ , P < 0.01) and higher scores of lack of family support ( $\beta = 0.41$ , P < 0.001) were found to predict significantly greater family caregiver burden                                   |



| First Author/Year | Diagnosis         | Outcome Measure                                                                                                                                                                                                                                                              | Result/Findings                                                                                                                                                                                                                                                                                                                                                                                                                                                                                                    |
|-------------------|-------------------|------------------------------------------------------------------------------------------------------------------------------------------------------------------------------------------------------------------------------------------------------------------------------|--------------------------------------------------------------------------------------------------------------------------------------------------------------------------------------------------------------------------------------------------------------------------------------------------------------------------------------------------------------------------------------------------------------------------------------------------------------------------------------------------------------------|
| Pressler (2013)   | HF<br>(NYHA I-IV) | Oberst Caregiving Burden Scale<br>Control Attitudes Scale<br>Patient Health Questionnaire-8<br>Brief Symptom Inventory Anxiety Subscale<br>Bakas Caregiving Outcomes Scale<br>Medical Outcomes Study Short Form-12<br>Charlson Comorbidity Index<br>Family Assessment Device | Caregivers perception of life changed - neutral on average and improved from baseline to 4 (P=0.054) and 8 (P= 0.030) months<br>Poor physical and emotional HRQOL at baseline<br>Caregivers of patients with high HF symptoms spent more time on caregiving tasks at 4mo.(P = 0.001) & 8 mo.(P=0.003), perceived greater difficulty with caregiving tasks (baseline P=0.031 & 4 mo. P <0.001) and reported higher bassline anxiety (P=0.019) and poorer physical HRQOL at baseline (P < 0.001) and 4 mo. (P=0.008) |
| Riegner (1996)    | COPD              | Caregiver Strain Index<br>Social Support Questionnaire – Short Form<br>Situational Humor Response Questionnaire<br>Coping Humor Scale<br>Life Situation Survey                                                                                                               | Role Strain significantly associated with quality of life ( $\beta = 0.15$ , $F=11.5$ , $p < .001$ )<br>For caregivers; social support satisfaction made a significant contribution to quality of life with $\beta = 0.26$ , $F=22.90$ , $p < .0001$ , and $R^2$ of .26                                                                                                                                                                                                                                            |
| Rolley (2010)     | CAD               | n/a                                                                                                                                                                                                                                                                          | 1) A gendered approach to health, illness and caring<br>2) Shock, disbelief and the process of adjustment following PCI<br>3) Challenges and changes of the carer-patient relationship<br>4) The needs of the carer: support and information                                                                                                                                                                                                                                                                       |
| *Saunders (2009)  | HF                | CES-D 10<br>Caregiver Reaction Assessment<br>Quality of Life Index                                                                                                                                                                                                           | Caregiver burden is associated with lower CG HRQOL; increased burden in support ( $r=-0.50$ , $p < .01$ ), finances ( $r=-0.52$ $p < .01$ ), schedule ( $r=-0.62$ , $p < .01$ ) and health ( $r=-.71$ , $p < .01$ ) = decreased HRQOL                                                                                                                                                                                                                                                                              |
| *Saunders (2008)  | HF                | (as above Saunders, 2009)                                                                                                                                                                                                                                                    | 76% of caregivers had health problems in past month<br>Highest to lowest burden ranked: schedule (M = 3.20, SD = 1.09), finances (M = 2.39, SD = 1.18), family (M = 2.38, SD = 1.10), and health (M = 2.21, SD = .98).                                                                                                                                                                                                                                                                                             |
| Saunders (2010)   | HF                | Centre for Epidemiological Studies Short Depression Scale<br>Quality of Life Index (QLI)                                                                                                                                                                                     | Caregiver depression not difference between employed and unemployed caregivers ( $t = 1.0$ , $p < 0.05$ )<br>Employed caregivers perceived higher well-being except for psychological/spiritual domain, well-being ( $t = -2.9$ , $p < 0.01$ ), health/function ( $t = -2.3$ , $p < 0.05$ ), socioeconomic ( $t = -2.7$ , $p < 0.05$ ), family ( $t = -3.4$ , $P < 0.01$ )                                                                                                                                         |

| First Author/Year | Diagnosis      | Outcome Measure                                                                                                                                                               | Result/Findings                                                                                                                                                                                                                                                                                                                |
|-------------------|----------------|-------------------------------------------------------------------------------------------------------------------------------------------------------------------------------|--------------------------------------------------------------------------------------------------------------------------------------------------------------------------------------------------------------------------------------------------------------------------------------------------------------------------------|
| Schwarz (2003)    | HF             | Perceived Stress Scale<br>Center for Epidemiological Studies Depression Scale<br>Inventory of Socially Supportive Behaviours Scale<br>Clinical Assays Gamma Coat<br>Cortisol  | The effects model with salivary cortisol was not significant (F=1.9, p=.15).<br>as measured by the PSS, was the only significant variable (t=5.80, p=.000)<br>No significant associations between salivary cortisol and the PSS (F=1.059, p=.384)                                                                              |
| Scott (2000)      | HF             | Caregiver Preparedness Scale<br>Minnesota Living with Health Failure Questionnaire<br>Caregiver Reaction Assessment<br>The Mental Health Inventory-5<br>Quality of Life Index | Caregivers reported being least prepared for stress associated with role (M = 2.11)<br>89% of caregiver scores for mental health were less than age norm<br>55% of the caregivers have to eliminate things from their schedule/interrupt current activities to provide care<br>39% of the caregivers reported constant fatigue |
| Spence (2008)     | COPD (Adv.)    | n/a                                                                                                                                                                           | 1) Impact of family caregiving<br>2) Unmet Support Needs<br>3) Carers' perceptions of patients                                                                                                                                                                                                                                 |
| Strom (2015)      | HF             | n/a                                                                                                                                                                           | 1) Being on the alert<br>2) Being a forced volunteer                                                                                                                                                                                                                                                                           |
| Takata (2008)     | COPD           | Zarit Burden Interview (Japanese version)<br>Barthel Index                                                                                                                    | 53.3% of caregivers were depressed<br>Caregivers providing longer term care were more burdened<br>HB caregivers want to use social services such as Nursing Home 90.9% v 34.8% (p<0.05)                                                                                                                                        |
| Vellone (2015)    | HF (NYHA I-IV) | Caregiver Contribution to Self-care of heart failure Index                                                                                                                    | 54.2% of caregivers were unable to recognize the signs and symptoms of a heart failure exacerbation quickly or very quickly                                                                                                                                                                                                    |
| Wallin (2013)     | CAD            | n/a                                                                                                                                                                           | 1) Difficulties managing a changed life situation<br>2) Feeling like I come second<br>3) Feeling new hope for the future                                                                                                                                                                                                       |
| Woolfe (2007)     | COPD           | Family Caregiver Needs Survey                                                                                                                                                 | Information is the most important need for caregivers (M= 6.37, SD = 0.8)<br>Important but poorly met needs = information (27.7), psychological (26.5) and personal (25.3)                                                                                                                                                     |

---

| <b>First Author/Year</b> | <b>Diagnosis</b> | <b>Outcome Measure</b> | <b>Result/Findings</b>                                                            |
|--------------------------|------------------|------------------------|-----------------------------------------------------------------------------------|
| Wingham (2015)           | HF               | n/a                    | 1) Providing support<br>2) Transition to becoming a caregiver<br>3) Engaging help |

---

**HF = Heart Failure, COPD = Chronic Obstructive Pulmonary Disease, LVAD = Left Ventricular Assist Device, LVAD DT = Left Ventricular Assist Device Destination Therapy, CAD = Coronary Artery Disease, n/a = not applicable, PCI = Percutaneous coronary intervention, MLWHFQ = Minnesota Living with Heart Failure Questionnaire**

**\* = same study**
